# Supplementary material for: An Evaluation of the Performance and Economics of Membranes and Separators in Single Chamber Microbial Fuel Cells Treating Domestic Wastewater
Source: PubMed Central journal article supplement (PMC4548946; doi:10.1371/journal.pone.0136108), 2015-08-25
Supplement: pone.0136108.s001.pdf [file pone.0136108.s001.pdf]

- 1 **S1 Table.** Conductivity measurements of the separators and membranes studied using AC  
 2 impedance spectroscopy in 1M PBS.

| <b>Membrane or separator</b>        | <b>Thickness<br/>/ <math>\mu\text{m}</math></b> | <b>Area<br/>resistance /<br/><math>\Omega \text{ cm}^2</math></b> | <b>Conductivity<br/>/ <math>10^{-3} \text{ S cm}^{-1}</math></b> | <b>Resistivity<br/>/ <math>\Omega \text{ cm}</math></b> |
|-------------------------------------|-------------------------------------------------|-------------------------------------------------------------------|------------------------------------------------------------------|---------------------------------------------------------|
| <b>Nafion</b>                       | 183                                             | 1.93                                                              | 9.5                                                              | 105.65                                                  |
| <b>ETFE-g-PSSA D.O.G.<br/>23%</b>   | 164                                             | 1.05                                                              | 15.7                                                             | 63.84                                                   |
| <b>ETFE-g-PSSA D.O.G.<br/>35%</b>   | 66                                              | 0.48                                                              | 13.8                                                             | 72.32                                                   |
| <b>HDPE-g-PSSA D.O.G.<br/>11%</b>   | 39                                              | 6.77                                                              | 0.6                                                              | 1734.70                                                 |
| <b>CoPVDF-g-PSSA D.O.G.<br/>10%</b> | 115                                             | 3.53                                                              | 3.3                                                              | 307.25                                                  |
| <b>PVDF-g-PSSA D.O.G.<br/>34%</b>   | 45                                              | 0.49                                                              | 9.1                                                              | 109.63                                                  |
| <b>Rhinohide</b>                    | 668                                             | 1.69                                                              | 39.4                                                             | 25.35                                                   |
| <b>Scimat 700/70</b>                | 127                                             | 0.49                                                              | 25.7                                                             | 38.85                                                   |
| <b>Scimat 700/77</b>                | 117                                             | 0.51                                                              | 23.0                                                             | 43.53                                                   |
| <b>Scimat 700/30k</b>               | 130                                             | 0.27                                                              | 48.3                                                             | 20.72                                                   |
| <b>Scimat 700/40k</b>               | 103                                             | 0.78                                                              | 13.2                                                             | 75.86                                                   |
| <b>Scimat 850/61</b>                | 91                                              | 1.07                                                              | 8.5                                                              | 117.51                                                  |
| <b>Tyvek</b>                        | 146                                             | 31.09                                                             | 0.5                                                              | 2129.13                                                 |
| <b>Carbon paper</b>                 | 300                                             | n/a                                                               | n/a                                                              | n/a                                                     |

3
