# Supplementary material for: An Evaluation of the Performance and Economics of Membranes and Separators in Single Chamber Microbial Fuel Cells Treating Domestic Wastewater
Source: PubMed Central journal article supplement (PMC4548946; doi:10.1371/journal.pone.0136108), 2015-08-25
Supplement: pone.0136108.s002.pdf [file pone.0136108.s002.pdf]

1 **S2 Table.** Oxygen diffusion, mass transport coefficient and permeability of the membrane  
 2 separators in water at 298 K.<sup>a</sup>

| <b>Membrane or separator</b>            | <b>k<sub>o</sub></b><br><b>/ 10<sup>-3</sup> cm s<sup>-1</sup></b> | <b>D<sub>o</sub></b><br><b>/10<sup>-5</sup> cm<sup>2</sup> s<sup>-1</sup></b> | <b>P<sub>M</sub></b><br><b>/ 10<sup>-6</sup> mg l<sup>-1</sup> s<sup>-1</sup> cm<sup>-2</sup> Pa</b> |
|-----------------------------------------|--------------------------------------------------------------------|-------------------------------------------------------------------------------|------------------------------------------------------------------------------------------------------|
| <b>Nafion</b>                           | 2.79                                                               | 5.1                                                                           | 4.38                                                                                                 |
| <b>Rhinohide</b>                        | 2.44                                                               | 16.3                                                                          | 4.52                                                                                                 |
| <b>Tyvek</b>                            | 2.62                                                               | 3.82                                                                          | 4.61                                                                                                 |
| <b>Carbon paper (wet proofed)</b>       | 3.73                                                               | 11.2                                                                          | 8.62                                                                                                 |
| <b>ETFE-g-PSSA D.O.G. 23%</b>           | 2.54                                                               | 4.16                                                                          | 5.01                                                                                                 |
| <b>ETFE-g-PSSA D.O.G. 35%</b>           | 2.17                                                               | 1.43                                                                          | 8.2                                                                                                  |
| <b>HDPE-g-PSSA D.O.G. 11%</b>           | 2.46                                                               | 0.957                                                                         | 4.83                                                                                                 |
| <b>PVDF Copolymer-g-PSSA D.O.G. 10%</b> | 2.79                                                               | 3.2                                                                           | 4.24                                                                                                 |
| <b>PVDF-g-PSSA D.O.G. 34%</b>           | 2.74                                                               | 1.23                                                                          | 4.25                                                                                                 |

3 <sup>a</sup> None of the Scimat separators could be analyzed due to water leakage.

4
